# Supplementary material for: Primary cilia as the nexus of biophysical and hedgehog signaling at the tendon enthesis
Source: PubMed Central journal article supplement — Sci Adv. 2020 Oct 30;6(44):eabc1799. doi: 10.1126/sciadv.abc1799 (PMC7608799; doi:10.1126/sciadv.abc1799), 2020-10-30
Supplement: abc1799_SM.pdf [file abc1799_SM.pdf]

[advances.sciencemag.org/cgi/content/full/6/44/eabc1799/DC1](https://advances.sciencemag.org/cgi/content/full/6/44/eabc1799/DC1)

## Supplementary Materials for

### **Primary cilia as the nexus of biophysical and hedgehog signaling at the tendon enthesis**

Fei Fang, Andrea G. Schwartz, Emily R. Moore, McKenzie E. Sup, Stavros Thomopoulos\*

\*Corresponding author. Email: [sat2@columbia.edu](mailto:sat2@columbia.edu)

Published 30 October 2020, *Sci. Adv.* **6**, eabc1799 (2020)  
DOI: [10.1126/sciadv.abc1799](https://doi.org/10.1126/sciadv.abc1799)

#### **This PDF file includes:**

Tables S1 to S3

Figs. S1 to S4

## Supplementary Materials

**Table S1.** Primers for Real-time RT-PCR assay.

| Gene            | Primer sequence                                                                        |
|-----------------|----------------------------------------------------------------------------------------|
| <i>GAPDH</i>    | Sense: 5'-TGTGTCCGTCGTGGATCTGA-3';<br>Antisense: 5'-TTGCTGTTGAAGTCGCAGGAG-3';          |
| <i>IFT88</i>    | Sense: 5'-TGGCCAACGACCTGGAGATTAACA-3';<br>Antisense: 5'-ATAGCTGCTGGCTTGGGCAAATTC-3';   |
| <i>IFT80</i>    | Sense: 5'-AAGGAACCAAAGCATCAAGAATTAG-3';<br>Antisense: 5'-AGATGTCATCAGGCAGCTTGAC-3';    |
| <i>Dync2li1</i> | Sense: 5'-ACCTTAGCGTTGGAGTACAC-3';<br>Antisense: 5'-TAAGTCCAGCAAGGAGGTTC-3';           |
| <i>Kif3a</i>    | Sense: 5'-GCTATAGACAGGCCGTCAGC-3';<br>Antisense: 5'-GTCTTTGGAGGTTCGTTGGA-3';           |
| <i>Ptch1</i>    | Sense: 5'-TGCTGTGCCTGTGGTCATCCTGATT-3';<br>Antisense: 5'-CAGAGCGAGCATAGCCCTGTGGTTC-3'; |
| <i>Gli1</i>     | Sense: 5'-GGTCTCGGGGTCTCAAACCTG-3';<br>Antisense: 5'-CCATTCTCTGGTGGGGTTCC-3';          |
| <i>Gli2</i>     | Sense: 5'-AACTTTTGTCTCCTCGGGTCC-3';<br>Antisense: 5'-CTGCTGTCCTCCAAGAGACC-3';          |
| <i>Gli3</i>     | Sense: 5'-AAGCCCATGACATCTCAGCC-3';<br>Antisense: 5'-CTCGAGCCCCTGTTGGAAT-3';            |

**Table S2.** Key reagents and their sources.

| <b>Reagent</b>                         | <b>Source</b> | <b>Catalog No.</b> | <b>Usage</b> |
|----------------------------------------|---------------|--------------------|--------------|
| Monoclonal acetylated tubulin          | Sigma         | T7451              | 1:300        |
| Arl13b                                 | Proteintech   | 17711-1-AP         | 1:50         |
| IFT88                                  |               | 13967-1-AP         | 1:100        |
| Perceptrin                             | Abcam         | ab4448             | 1:200        |
| Smoothened                             | LSBio         | LS-A2666           | 1:100        |
| Gli1                                   | Abcam         | ab49314            | 1:500        |
| Goat anti-mouse IgG, Alexor Fluor 488  | ThermoFisher  | A-11001            |              |
| Goat anti-mouse IgG, Alexor Fluor 568  |               | A-11031            |              |
| Goat anti-mouse IgG, Alexor Fluor 647  |               | A-32733            |              |
| Goat anti-rabbit IgG, Alexor fluor 488 |               | A-11008            | 1:1000       |
| Goat anti-rabbit IgG, Alexor Fluor 568 |               | A-11011            |              |
| Goat anti-rabbit IgG, Alexor Fluor 647 |               | A-21244            |              |
| DAPI                                   |               | D1306              |              |

**Table S3.** Sample sizes for assays.

|                                                  |            | Sample size          |        |               |          |              |
|--------------------------------------------------|------------|----------------------|--------|---------------|----------|--------------|
|                                                  |            | Histology<br>and IHC | RT-PCR | Gait analysis | $\mu$ CT | Biomechanics |
|                                                  | P1-W13     | 5                    |        |               |          |              |
| C57BL/6J<br>mice                                 | Control    | 4                    | 4      |               |          |              |
|                                                  | Overloaded | 5                    | 4      |               |          |              |
|                                                  | Unloaded   | 5                    |        |               |          |              |
| Gli1CreER <sup>T2</sup> ;Rosa26 <sup>mT/mG</sup> |            | 4-5                  | 6-7    |               |          |              |
| ScxCre;IFT88 <sup>fl/fl</sup> or WT              |            | 4-5                  |        | 5-9           | 5-11     | 5-12         |
| ScxCre;<br>Smo <sup>fl/fl</sup><br>or WT         | Control    | 5-7                  |        | 7-8           | 7-9      | 7-9          |
|                                                  | Overloaded | 5                    |        | 8             | 8-9      | 7-8          |
|                                                  | Unloaded   | 4-5                  |        | 8             | 8        | 8            |

Note: Sample sizes were balanced between male and female mice;  $\mu$ CT, microcomputed tomography.

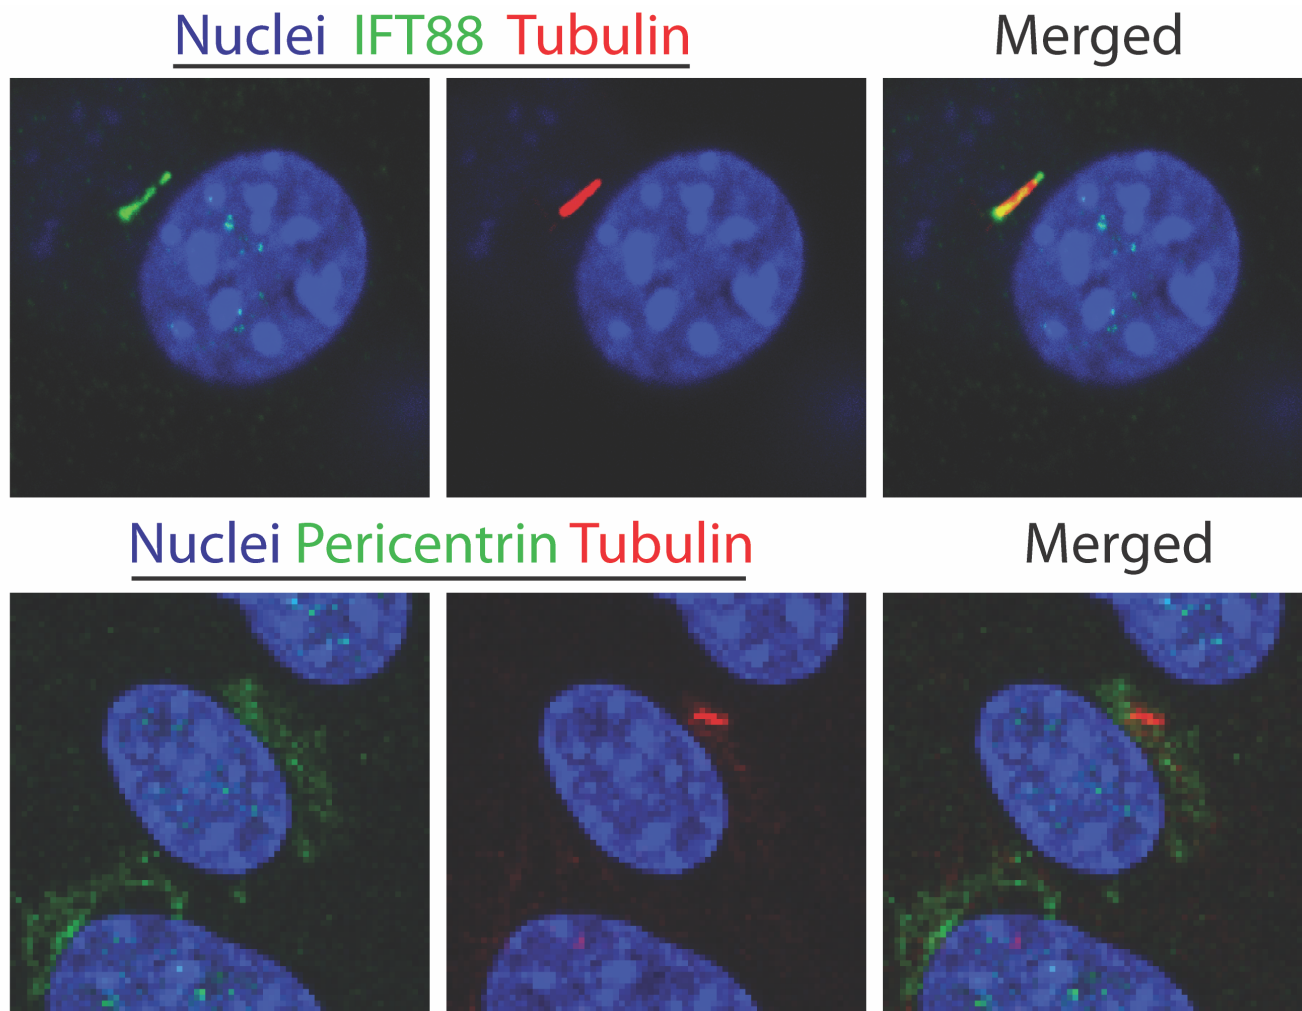

**Fig. S1. Representative images showing the presence of primary cilia at the tendon enthesis.** Cilia are visualized by ciliary markers IFT88 (green, top) and acetylated tubulin (red) and the centrosome marker pericentrin (green, bottom).

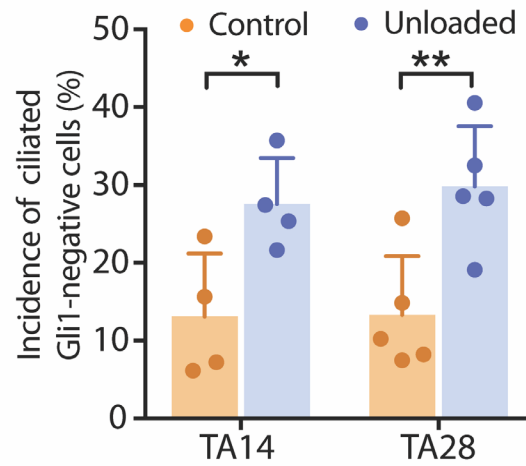

**Fig. S2. Quantification of incidence of ciliated Gli1-negative cells, normalized by the number of Gli-negative cells.** Incidence was determined from immunofluorescent images of tendon entheses of GliCreER<sup>T2</sup>;Rosa26<sup>mT/mG</sup> mice with tamoxifen injection at P14 or P28 (labelled TA14 and TA28, respectively) and by neonatal BtxA-induced paralysis (unloaded) or saline injection (control) at the time points indicated. TA, tamoxifen injection. \* $p < 0.05$ , \*\* $p < 0.01$ .

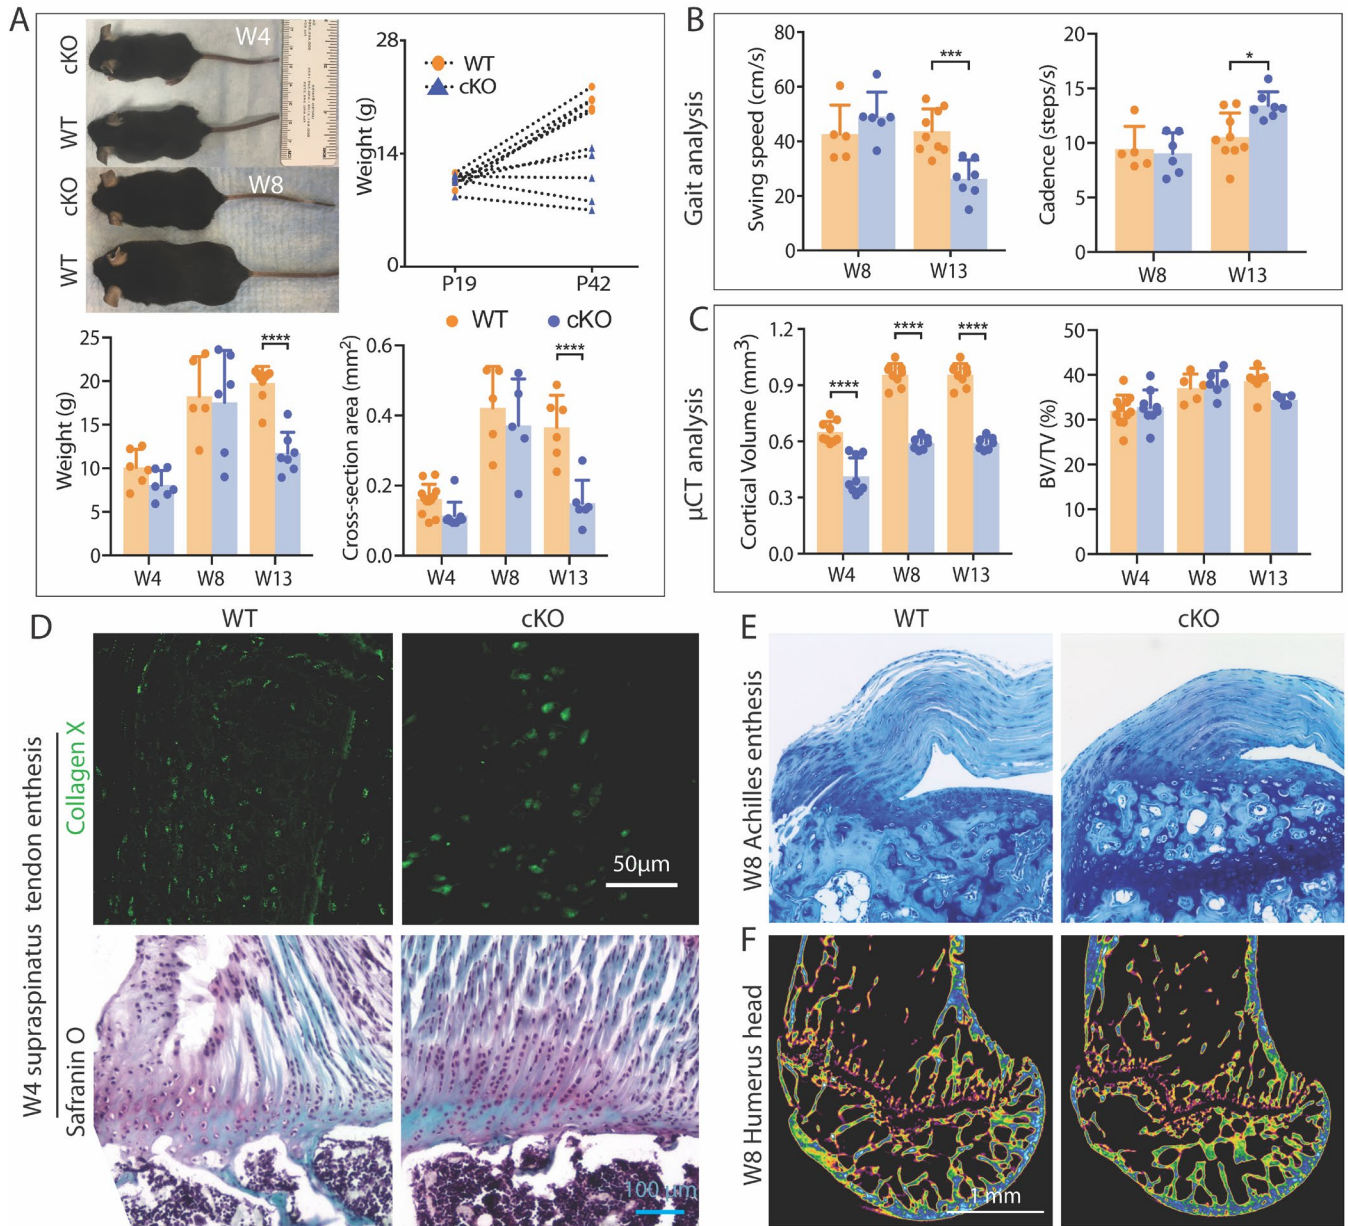

**Fig. S3. Phenotype of cilia knockout ScxCre;IFT88<sup>fl/fl</sup> (cKO) mice.**

(A) Mice with cilia deletion appeared normal at W4 but were smaller than WT controls by week 13. ScxCre;IFT88<sup>fl/fl</sup> mice had retarded growth rates after P19. Photo Credit: Fei Fang, Columbia University.

(B) Gait patterns, including swing speed and cadence, were changed in 13-week-old ScxCre;IFT88<sup>fl/fl</sup> mice compared to WT controls.

(C) Trabecular volume normalized to total volume (BV/TV) and cortical bone volume were decreased in ScxCre;IFT88<sup>fl/fl</sup> mice compared to WT controls.

(D) Immunostaining for collagen X and Safranin O staining of tendon entheses from 4-week-old mice showed minor changes in fibrocartilage formation in cKO mice compared to WT controls.

(E) Collagen organization of the Achilles tendon of 8-week old ScxCre;IFT88<sup>fl/fl</sup> mice was similar to WT controls.

(F) Bone morphology of humerus head from 8-week old cKO mice was similar to WT controls.

\* $p < 0.05$ , \*\* $p < 0.01$ , \*\*\* $p < 0.001$ , \*\*\*\* $p < 0.0001$ .

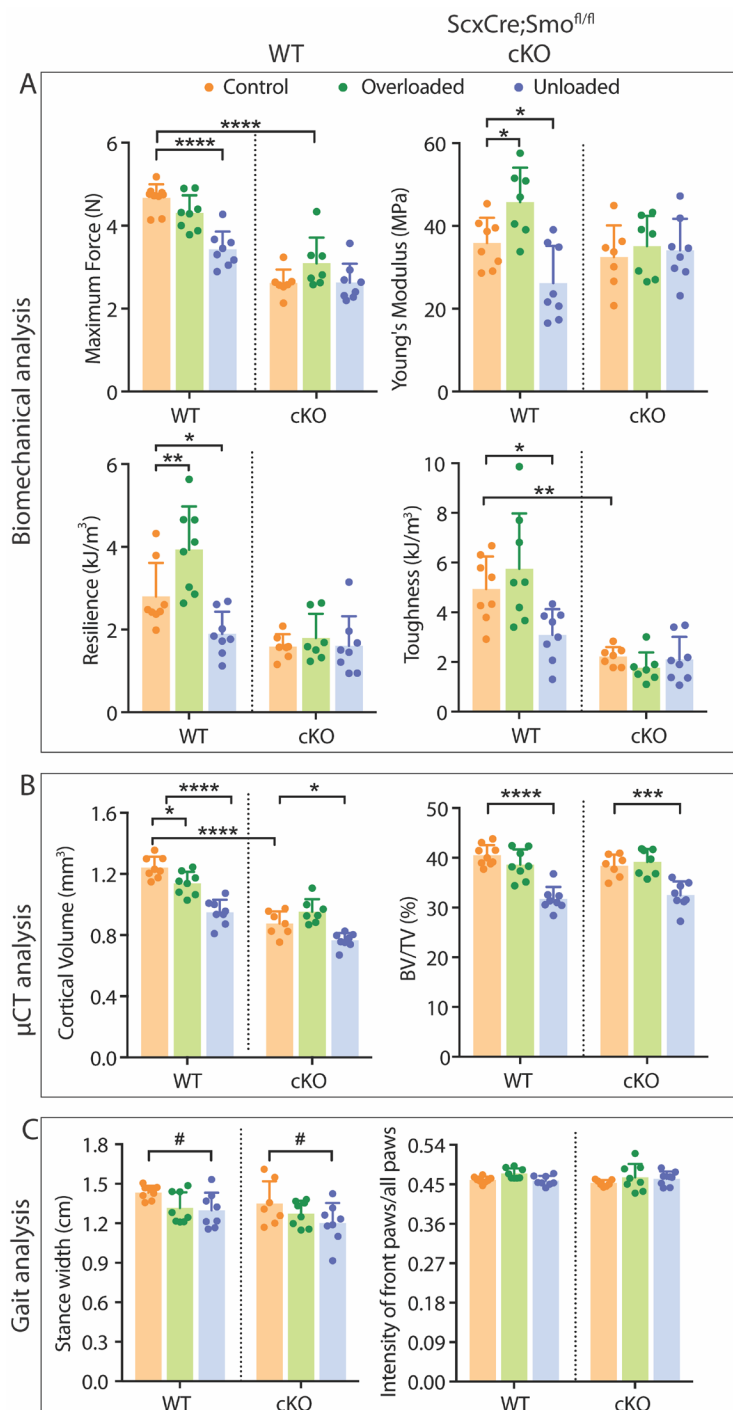

**Fig. S4. Functional evaluation of Hh disrupted mice subjected to overloading and unloading treatments.**

(A) Biomechanical analysis showed that WT mouse tendon entheses were responsive to changes in loading, whereas ScxCre;Smo<sup>fl/fl</sup> (cKO) tendon entheses were unresponsive to changes in loading.

(B)  $\mu$ CT analysis showed that humeral head cortical volume and BV/TV were similarly affected by changes to loading in WT and cKO mice.

(C) Gait analysis showed that walking posture and stance width were similarly affected to changes to loading in WT and cKO mice. Stance width: distance between the front paws; Intensity of front paws/all paws: average of the 15 most intense pixels from complete front paws divided by that from all four paws.

\* $p < 0.05$ , \*\* $p < 0.01$ , \*\*\* $p < 0.001$ , \*\*\*\* $p < 0.0001$ .
